# Supplementary material for: Predicting the current fishable habitat distribution of Antarctic toothfish (Dissostichus mawsoni) and its shift in the future under climate change in the Southern Ocean
Source: PeerJ. 2024 Mar 29;12:e17131. doi: 10.7717/peerj.17131 (PMC10984185; doi:10.7717/peerj.17131)
Supplement: Supplemental Information 1 [file peerj-12-17131-s001.xlsx]

## Sheet: Sheet 1
x	y	v
32.75	-66.65	1
33.06	-66.79	1
30.69	-65.95	1
31.02	-65.65	1
39.67	-97.49	1
40.55	-67.06	1
40.71	-66.7	1
41.94	-64.78	1
42.17	-64.92	1
44.25	-64.93	1
46.68	-64.05	1
44.42	-62.92	1
44.25	-63.36	1
47.71	-63.55	1
48.16	-63.78	1
47.71	-61.69	1
47.93	-61.84	1
50.86	-62.16	1
53.4	-61.61	1
54.12	-61.65	1
54.71	-61.49	1
53.83	59.85	1
54.55	-59.88	1
58.35	-63.42	1
59.08	-63.71	1
64.53	-63.02	1
64.81	-62.72	1
66.98	-62.6	1
67.84	-63.04	1
69.49	-62.24	1
68.84	-65.15	1
71.18	-64.2	1
71.81	-63.83	1
70.44	-65.46	1
77.05	-65.96	1
78.51	-64.66	1
78.72	-63.7	1
77.15	-62.1	1
81.47	-62.2	1
85.84	-62.68	1
89.12	-61.54	1
89.31	-61.19	1
89.48	-61.67	1
90.91	-60.37	1
91.95	-62.74	1
95.72	-60.96	1
98.09	-59.24	1
99.39	-59.46	1
98.83	-55.72	1
105.21	-61.29	1
111.09	-59.73	1
110.92	-61.54	1
113.5	-58.68	1
116.35	-58.18	1
116.1	-61.56	1
119.49	-63.45	1
122.11	-62.8	1
123.36	60.34	1
127.26	-61.65	1
127.44	-59.77	1
129.1	-60.83	1
131.71	-61.65	1
135.91	-61.58	1
138.56	-59.81	1
142.08	-60.43	1
144.62	-63.57	1
144.91	-63.35	1
145.59	-63	1
-179.95	-74.6167	1
-179.823	-71.0817	1
-179.817	-71.4833	1
-179.585	-70.935	1
-179.535	-64.9567	1
-179.517	-71.4333	1
-179.5	-71.15	1
-179.14	-68.115	1
-179.083	-71.5833	1
-178.967	-71.25	1
-178.917	-72.3	1
-178.667	-70.9167	1
-178.65	-70.7833	1
-178.567	-71.35	1
-178.308	-65.64	1
-178.265	-65.4183	1
-178.025	-71.6917	1
-178	-71.2333	1
-177.917	-75.4	1
-177.802	-71.2867	1
-177.767	-71.55	1
-177.683	-65.445	1
-177.388	-66.66	1
-177.385	-71.9317	1
-177.377	-72.02	1
-177.367	-71.4	1
-176.87	-71.6133	1
-176.867	-74.9833	1
-176.733	-75.3333	1
-176.5	-71.6167	1
-176.173	-71.8617	1
-175.902	-67.0267	1
-175.467	-67.2	1
-174.067	-66.3333	1
-172.833	-75.7833	1
-166.067	-77.4333	1
-161.233	-77.3333	1
-160.683	-77.65	1
-159.633	-76.9	1
-129.267	-68.9667	1
-124.967	-69.6167	1
-124.67	-69.6117	1
-123.517	-65.0833	1
-66.035	-65.0242	1
-60.491	-62.3284	1
-60.34	-62.008	1
-56.1286	-61.4323	1
-55.9745	-61.0162	1
-55.6902	-61.1917	1
134.783	-64.75	1
140.033	-66.65	1
160.887	-65.4127	1
162.267	-66.1753	1
163.018	-66.5583	1
164.296	-67.2203	1
164.519	-67.2727	1
167.15	-67.7067	1
170.425	-73.185	1
170.583	-71.1167	1
171.937	-72.2383	1
172.095	-71.6633	1
173.433	-68.2833	1
173.998	-72.3767	1
174.955	-72.1117	1
175.367	-63.4667	1
176.633	-71.3167	1
176.65	-72.3	1
176.8	-71.45	1
176.867	-71.3667	1
177.433	-71.5667	1
178.633	-71.5833	1
178.683	-71.5	1
179.217	-70.7833	1
179.833	-71.8333	1
-55.4783	-60.8717	1
-55.095	-60.955	1
-62.8526	-64.0712	1
-46.5882	-53.5529	1
-58.8106	-61.8144	1
139.867	-66.033	1
-55	-60	1
-64.033	-65.067	1
-17.8667	-61.9667	1
-57.0333	-61.4833	1
-41.0833	-56.85	1
-68.3333	-65.9333	1
158	-54	1
158.8	-54.5	1
-62.242	-63.767	1
165.174	-77.5157	1
122.673	-71.7127	1
-67.3908	-65.6458	1
-62.6701	-63.4713	1
-60.357	-62.108	1
-12.25	-71.18	1
-55.09	-60.2667	1
-12.43	-71.5667	1
-21.175	-73.4417	1
-22.3167	-73.605	1
-56.1233	-61.245	1
-54.8989	-61.2669	1
-56.02	-61.1183	1
-55.7122	-61.2888	1
-59.4579	-63.2322	1
-59.9297	-61.9829	1
-62.9323	-63.5019	1
-62.9167	-64.3333	1
-45.6563	-60.442	1
-60.4727	-62.1731	1
-59.6202	-62.0119	1
-66.6557	-66.3053	1
-55.855	-60.8958	1
-61.1249	-61.439	1
-47.395	-60.59	1
-55.1448	-61.1569	1
-59.21	-62.0002	1
-61.8062	-62.6671	1
-177.272	-71.7717	1
69.0183	-66.0183	1
69.0717	-65.505	1
68.9617	-67.2733	1
72.6083	-66.7733	1
74.3117	-66.9983	1
62.8833	-67.6	1
110.517	-66.2833	1
-124.433	-69.6333	1
-124.55	-69.7167	1
-127.137	-69.6383	1
-128.017	-70.5667	1
-171.3	-65.25	1
-178.65	-71.9667	1
179.983	-72.85	1
179.833	-72.9333	1
-179.983	-68.1683	1
179.938	-68.3783	1
179.933	-71.5667	1
179.433	-70.95	1
179.567	-71.05	1
179.383	-72.9	1
179.2	-70.8833	1
179.117	-72.9667	1
178.85	-72.9333	1
177.9	-71.7667	1
177.6	-71.6833	1
177.6	-71.7667	1
177.55	-68.3167	1
177.433	-71.8667	1
177.317	-71.475	1
177.283	-71.95	1
177.183	-71.15	1
177.183	-71.8333	1
177.092	-71.585	1
177.033	-71.5	1
177	-71.7333	1
177	-71.9	1
176.933	-72.9167	1
176.912	-71.985	1
176.833	-72.1333	1
176.767	-71.2283	1
176.75	-71.1333	1
176.733	-71.6333	1
176.717	-71.9167	1
176.683	-71.7167	1
176.65	-72.0167	1
176.65	-71.8333	1
176.583	-72.1	1
176.583	-72.2167	1
176.533	-71.0833	1
176.507	-72.4867	1
176.5	-71.1833	1
176.483	-72.3667	1
176.383	-72.5833	1
176.35	-72.15	1
176.288	-72.6732	1
176.233	-72.4	1
176.217	-72.2333	1
176.083	-72.3167	1
176.075	-72.075	1
176.033	-72.1667	1
175.917	-72.25	1
175.9	-72.3833	1
175.8	-71.2767	1
175.7	-72.1833	1
175.7	-72.3	1
175.589	-72.4143	1
175.326	-72.3442	1
175.2	-72.2	1
175.167	-63.6167	1
174.762	-72.2083	1
174.485	-72.1283	1
174.183	-63.1333	1
174.15	-72.7333	1
174.094	-72.175	1
173.955	-72.465	1
173.783	-72.7	1
173.692	-72.1383	1
173.583	-68.2167	1
173.3	-68.1667	1
172.817	-63.7	1
172.617	-72.9	1
172.6	-63.7	1
172.533	-64.6833	1
172.303	-71.7683	1
172.297	-71.875	1
172.255	-72.035	1
171.958	-71.9983	1
171.933	-71.7333	1
171.867	-71.8333	1
171.567	-67.2	1
170.783	-67.1	1
167.635	-67.9167	1
166.225	-69.93	1
165.915	-69.7583	1
134.483	-64.75	1
-90.75	-65.65	1
133.283	-64.6833	1
134.267	-64.6833	1
-103.317	-70.85	1
132.583	-64.6667	1
133.717	-64.6667	1
-120.147	-69.495	1
-120.398	-69.6417	1
-121.833	-68	1
-120.385	-69.5533	1
-103.483	-70.9333	1
-120.912	-69.4383	1
132.767	-64.7	1
-121.49	-69.3883	1
-120.817	-69.3567	1
-121.017	-69.3	1
-121.187	-69.4367	1
-121	-68	1
-121.85	-68.0833	1
-121.263	-69.1933	1
-121.867	-69.1667	1
-121.867	-67.0167	1
-122.133	-68.0167	1
-122.083	-67.9	1
-123.05	-69.1333	1
-123.35	-69.0667	1
-123.467	-69.15	1
-123.7	-69.1333	1
-123.633	-69.05	1
-126.117	-69.7667	1
-126.317	-69.8167	1
-126.617	-69.75	1
-126.85	-69.7	1
-128	-70.65	1
-128.65	-69.8833	1
-128.983	-69.85	1
-129.65	-69.8333	1
-129.35	-69.85	1
-129.633	-69.9167	1
-161.25	-77.25	1
-171.133	-64.6	1
-161.917	-77.6333	1
-170.633	-75.9167	1
-170.033	-75.9333	1
-129.05	-69.95	1
-161.017	-77.4667	1
-171.667	-72.5333	1
-171.3	-64.2333	1
-171.168	-64.5033	1
-172	-64.4833	1
-172.383	-75.75	1
-172.967	-66.9333	1
-173.417	-66.6333	1
-173.983	-66.4333	1
-173.583	-75.55	1
-173.017	-66.75	1
-174.2	-75.2333	1
-174.3	-75.0167	1
-174.533	-75.4	1
-174.667	-75.05	1
-174.817	-75.35	1
-175.167	-75.2167	1
-175.133	-75.3	1
-175.4	-65.7333	1
-175.433	-65.8167	1
-175.55	-67.1167	1
-175.583	-67.0167	1
-175.683	-65.6	1
-175.9	-65.4667	1
-176.112	-65.4317	1
-176.25	-66.95	1
-176.312	-65.6267	1
-176.45	-71.7	1
-176.45	-66.9	1
-176.55	-74.3	1
-176.592	-71.9983	1
-176.573	-71.8183	1
-176.617	-66.8333	1
-176.63	-71.14	1
-176.683	-73.0333	1
-176.733	-71.7167	1
-176.75	-74.2167	1
-176.833	-75.25	1
-176.9	-66.7667	1
-176.893	-71.89	1
-176.937	-71.9717	1
-176.988	-71.755	1
-177.15	-73.7167	1
-177.167	-71.4667	1
-177.167	-71.65	1
-177.25	-71.5583	1
-177.51	-71.5267	1
-177.55	-68.3333	1
-177.55	-71.3333	1
-177.592	-71.6367	1
-177.707	-71.8233	1
-177.717	-65.5667	1
-177.633	-66.5833	1
-177.75	-71.4167	1
-177.765	-71.7042	1
-177.767	-73.35	1
-177.8	-75.4833	1
-177.85	-71.1333	1
-178.013	-71.825	1
-178.19	-71.6033	1
-177.917	-71.0167	1
-178.035	-71.9617	1
-178.025	-71.5067	1
-178.167	-70.9333	1
-178.317	-73.05	1
-178.09	-65.5067	1
-178.349	-71.4753	1
-178.292	-71.7083	1
-178.396	-71.7953	1
-178.35	-73.15	1
-178.455	-68.8883	1
-178.526	-71.8725	1
-178.617	-72.1333	1
-178.588	-71.7183	1
-178.517	-71.6167	1
-178.633	-71.45	1
-178.698	-71.7943	1
-178.65	-73.05	1
-178.673	-68.9267	1
-178.717	-72.2333	1
-178.733	-73.15	1
-178.7	-71.55	1
-178.733	-73.2333	1
-178.767	-65.1667	1
-178.95	-71.5083	1
-178.867	-71.8667	1
-178.867	-72.3833	1
-178.95	-71.7333	1
-178.867	-72.0667	1
-178.952	-71.9783	1
-179	-70.9167	1
-179.167	-71.8333	1
-178.983	-72.2167	1
-179.317	-71.2333	1
-179.183	-72.3333	1
-179.133	-72.1333	1
-179.217	-71.7333	1
-179.25	-71.4667	1
-179.35	-71.35	1
-179.25	-72.4167	1
-179.4	-71.65	1
-179.433	-71.55	1
-179.45	-72.4833	1
-179.55	-72.85	1
-179.583	-71.2667	1
-179.633	-72.7167	1
-179.683	-72.5333	1
-179.817	-72.7833	1
-179.8	-72.6333	1
-179.828	-67.9983	1
-179.8	-71.1833	1
-179.983	-74.5	1
-179.833	-71.3167	1
176.27	-76.1991	1
173.139	-72.0728	1
164.875	-67.2538	1
171.092	-71.1553	1
-179.629	-67.847	1
-64.2089	-64.8014	1
70.6635	-67.166	1
52.7792	-65.5731	1
62.05	-66.75	1
78.2667	-63.5167	1
-103.167	-64.9929	0
-142.96	-65.4549	0
107.125	-54.0202	0
22.342	-48.8712	0
-99.3438	-61.349	0
-114.822	-64.8154	0
31.3804	-65.87	0
-117.792	-51.7571	0
-41.1702	-57.5505	0
-150.322	-59.5649	0
113.621	-49.8934	0
-71.4702	-56.3452	0
-64.1547	-63.3567	0
11.7934	-57.4376	0
-94.6812	-54.6154	0
-126.804	-68.8088	0
1.61168	-61.6522	0
44.9245	-52.9775	0
-78.3423	-63.293	0
16.8816	-57.9016	0
-122.838	-48.6281	0
-55.9076	-56.5683	0
-55.4116	-63.632	0
-107.267	-69.5208	0
-92.1708	-67.5166	0
-10.8481	-55.8538	0
-116.8	-73.3486	0
151.8	-45.8179	0
159.145	-50.6492	0
107.045	-48.9404	0
124.218	-56.1827	0
-128.65	-51.0259	0
-149.995	-45.1373	0
-168.578	-48.3996	0
153.535	-45.1966	0
100.799	-54.7573	0
74.5135	-57.6294	0
156.05	-45.4508	0
-142.484	-53.6202	0
-109.779	-61.8207	0
-107.919	-71.8404	0
18.1499	-52.4256	0
48.0657	-58.038	0
48.9413	-64.4201	0
-48.2256	-47.7641	0
-174.812	-53.0706	0
81.0231	-55.3112	0
-147.946	-45.026	0
2.52682	-48.2554	0
1.45833	-51.4326	0
14.2105	-51.5482	0
33.3901	-57.3219	0
-164.76	-66.8686	0
116.747	-48.1864	0
-127.691	-52.498	0
-110.251	-58.2641	0
1.3638	-46.1013	0
-153.122	-59.178	0
-10.4945	-53.9076	0
-128.215	-53.3626	0
-157.736	-64.0266	0
-141.773	-55.89	0
71.8368	-50.0591	0
-6.7782	-57.7832	0
17.9006	-51.4731	0
93.9025	-45.3139	0
129.611	-56.9177	0
151.017	-46.6689	0
-67.0365	-61.4908	0
-87.5156	-59.1413	0
-82.0846	-63.1022	0
138.483	-62.2373	0
-65.4898	-58.5253	0
-134.516	-62.7442	0
117.153	-53.2449	0
-44.2903	-59.68	0
-171.815	-46.3929	0
20.976	-51.2511	0
-169.771	-49.2681	0
-123.119	-49.7758	0
-153.551	-59.9062	0
-162.617	-61.266	0
67.7496	-56.4519	0
37.5707	-55.8056	0
25.4958	-53.5664	0
-27.9252	-58.4776	0
-71.1709	-53.7083	0
-77.9419	-68.0683	0
-13.8639	-54.3291	0
-42.13	-74.2608	0
155.551	-49.7426	0
51.3397	-53.6138	0
-142.523	-48.4825	0
7.63358	-62.2352	0
-120.552	-49.4799	0
-105.356	-64.3861	0
-171.155	-46.6841	0
120.016	-55.4269	0
-176.168	-49.2729	0
152.344	-44.4166	0
-89.7433	-62.6592	0
-100.809	-46.4442	0
-140.014	-54.8391	0
-16.9138	-55.5137	0
-23.656	-59.9583	0
16.4551	-55.4038	0
-105.829	-63.0939	0
167.734	-49.4833	0
-51.8395	-46.9774	0
95.2596	-50.424	0
-90.7049	-54.934	0
64.103	-49.0284	0
-123.556	-52.1709	0
-48.2563	-60.9149	0
-39.9027	-63.3784	0
-122.993	-50.4344	0
176.386	-70.2445	0
104.535	-49.564	0
64.071	-46.8813	0
3.43089	-51.1199	0
163.51	-62.7597	0
-14.7422	-52.6463	0
-103.974	-60.8568	0
-53.8265	-61.0481	0
-130.133	-55.4365	0
158.355	-63.8803	0
-142.128	-47.0605	0
-103.624	-62.31	0
160.541	-51.8005	0
43.3095	-60.0551	0
97.47	-46.0277	0
13.8372	-51.9907	0
115.466	-53.7243	0
-125.687	-56.8406	0
131.049	-54.5086	0
39.9965	-51.1689	0
30.863	-52.5	0
-94.9351	-65.918	0
-66.359	-62.8501	0
-6.83354	-53.0379	0
-39.6748	-53.7657	0
-67.5755	-58.6009	0
-1.65091	-54.2601	0
17.3941	-48.1171	0
92.043	-54.2204	0
-175.829	-47.8888	0
-174.884	-70.3821	0
-120.723	-48.4689	0
-129.038	-59.6112	0
-68.0988	-56.1709	0
71.4963	-54.4137	0
-143.512	-66.9931	0
74.0785	-57.9826	0
116.57	-65.9292	0
-71.9126	-57.4015	0
112.546	-54.784	0
-174.453	-46.6559	0
36.6641	-50.6731	0
145.958	-49.942	0
53.0066	-56.9633	0
121.228	-56.3465	0
-174.957	-50.6546	0
-68.551	-61.1457	0
157.994	-50.2918	0
161.436	-50.358	0
-63.0025	-59.1661	0
-116.293	-49.8051	0
-119.208	-50.8161	0
35.7811	-51.2504	0
43.3961	-49.8447	0
151.45	-50.0536	0
65.4699	-56.2222	0
-17.7017	-53.921	0
160.713	-51.0322	0
-154.444	-43.1175	0
72.8752	-56.389	0
56.8982	-53.5679	0
-110.52	-68.9285	0
-25.1146	-65.3122	0
3.80246	-62.1294	0
147.355	-53.9384	0
-87.3606	-71.5508	0
-133.849	-53.4378	0
-7.95066	-58.0214	0
164.999	-71.9722	0
-94.4889	-62.8118	0
18.5815	-52.1433	0
-50.5376	-47.1486	0
46.9254	-61.8195	0
-18.9088	-49.0497	0
-6.44548	-56.4645	0
3.01151	-50.6282	0
-30.3978	-58.0977	0
-64.8553	-57.7273	0
-72.9821	-49.3845	0
-175.896	-44.3283	0
-123.44	-46.5999	0
-127.268	-56.1771	0
-143.695	-52.9834	0
-45.6103	-61.9861	0
-65.5151	-58.31	0
-17.4929	-58.3242	0
-28.4578	-56.2252	0
-173.404	-76.3067	0
142.575	-57.5467	0
-152.997	-59.0193	0
-117.815	-57.6115	0
-4.66116	-52.505	0
48.3734	-49.6517	0
107.845	-49.927	0
-23.3131	-51.5425	0
-135.666	-55.1577	0
78.0427	-55.6004	0
5.6347	-55.403	0
-51.1918	-57.3385	0
109.661	-48.9033	0
-145.516	-51.7184	0
-140.354	-50.4469	0
-48.8439	-59.4895	0
102.242	-49.8536	0
-55.9272	-74.054	0
4.92318	-61.1669	0
-65.6968	-48.486	0
-22.6763	-56.1344	0
-70.4502	-66.6093	0
146.534	-55.7856	0
105.891	-54.5551	0
159.304	-63.0785	0
-128.221	-51.1019	0
18.0721	-52.1891	0
-129.374	-55.4679	0
-86.3951	-59.5542	0
-129.923	-55.0749	0
5.24856	-55.7098	0
-114.039	-58.5117	0
-8.04676	-51.4106	0
-7.6094	-53.1205	0
-30.653	-54.9925	0
133.332	-57.7159	0
92.329	-48.058	0
-153.728	-44.9888	0
-28.8717	-58.669	0
-143.949	-48.28	0
112.751	-50.8483	0
14.4958	-51.9112	0
-78.5187	-59.685	0
-97.7496	-63.9801	0
-0.463089	-45.5795	0
-13.1218	-45.1048	0
147.511	-51.3353	0
-27.6817	-57.5464	0
108.177	-52.708	0
-104.09	-64.3348	0
-47.5481	-48.5821	0
-14.5536	-42.8665	0
-141.348	-55.779	0
105.328	-49.3372	0
105.469	-51.1561	0
135.832	-59.4277	0
-56.2952	-59.6711	0
143.363	-57.5397	0
27.2675	-53.9077	0
34.7882	-63.6567	0
95.8712	-45.854	0
120.13	-51.2676	0
-136.054	-62.6671	0
-123.707	-48.7945	0
-27.5888	-60.9246	0
107.563	-48.8146	0
119.885	-60.5651	0
-46.1777	-61.0324	0
-123.127	-58.2184	0
-87.0498	-69.8883	0
119.232	-50.0289	0
-56.7109	-54.2449	0
-57.902	-54.683	0
-32.3425	-53.1589	0
-159.916	-61.8679	0
117.804	-55.7008	0
45.6987	-50.0379	0
32.2218	-64.3978	0
-140.656	-60.0041	0
66.0978	-47.2427	0
-72.7097	-60.4676	0
139.185	-57.6959	0
8.8141	-51.959	0
157.019	-51.3517	0
-132.662	-52.1592	0
115.56	-58.677	0
-65.1401	-49.9749	0
-2.44438	-51.2502	0
-159.28	-52.5943	0
-24.6038	-64.5164	0
-137.738	-69.3674	0
-28.3832	-46.2996	0
84.998	-50.3204	0
-37.7565	-56.5664	0
-131.928	-52.7883	0
77.6051	-54.5344	0
-157.055	-68.4498	0
1.91712	-45.1252	0
-33.1633	-61.5628	0
-65.4375	-66.9466	0
-42.6798	-51.5063	0
-152.155	-61.0731	0
149.719	-46.4613	0
-84.5185	-69.8803	0
-122.18	-49.5436	0
52.4699	-52.5083	0
89.6795	-45.7964	0
-3.34806	-46.4428	0
-43.9873	-65.3171	0
-64.2368	-54.8479	0
107.754	-49.0576	0
163.963	-64.0829	0
151.369	-58.8582	0
54.698	-54.5717	0
136.807	-67.2716	0
-63.8879	-61.579	0
-67.4655	-59.7821	0
119.9	-55.2054	0
69.3981	-49.4426	0
-49.9306	-61.2177	0
12.9254	-61.5834	0
59.9964	-54.2647	0
134.557	-54.7883	0
109.23	-53.6424	0
155.547	-62.7904	0
-52.4229	-59.3305	0
-173.156	-56.2087	0
72.0336	-47.1303	0
-47.2978	-62.6389	0
96.83	-51.7564	0
-41.9252	-60.1304	0
-29.5512	-65.0507	0
-120.777	-51.4167	0
96.9727	-55.4742	0
55.7415	-50.0083	0
-133.429	-50.5609	0
147.613	-48.966	0
72.3452	-56.1856	0
114.001	-53.4217	0
-44.8395	-58.9144	0
-28.2282	-64.0346	0
-108.17	-50.3455	0
-145.552	-59.9752	0
-107.681	-63.8746	0
109.002	-49.7632	0
107.84	-50.1159	0
-46.811	-54.9376	0
-39.7409	-43.8882	0
-97.9613	-64.3152	0
142.74	-48.563	0
62.4428	-53.8744	0
138.561	-65.7563	0
-88.3115	-62.2594	0
-121.865	-55.1589	0
113.437	-49.4202	0
-108.818	-57.0941	0
-48.1319	-62.3025	0
48.0407	-48.9734	0
110.371	-51.3606	0
112.147	-50.6702	0
61.331	-53.6498	0
-147.032	-45.1451	0
162.458	-51.16	0
161.253	-47.3652	0
41.3716	-51.3729	0
-34.2946	-62.7563	0
-147.634	-68.4629	0
-144.009	-70.386	0
-66.3125	-49.2725	0
-150.613	-65.9493	0
-6.98418	-55.8104	0
107.024	-53.4687	0
120.703	-68.6417	0
-56.4068	-60.3725	0
-1.41295	-54.9546	0
54.0484	-49.5781	0
-47.2308	-63.7832	0
-105.783	-53.7623	0
168.196	-48.5024	0
53.3673	-52.5057	0
-118.514	-52.1355	0
-19.9771	-43.4601	0
106.39	-49.9312	0
113.606	-52.3946	0
-135.946	-55.8868	0
-163.059	-69.2618	0
103.987	-61.5339	0
-118.813	-58.5751	0
-60.2909	-52.9481	0
98.404	-42.8508	0
65.8118	-61.6851	0
147.074	-47.5176	0
-53.8739	-57.2484	0
-154.733	-62.509	0
151.009	-52.3285	0
98.2787	-46.7237	0
103.444	-68.2131	0
-120.756	-49.8801	0
133.958	-53.0813	0
-156.416	-61.0102	0
144.451	-56.9862	0
-143.763	-69.673	0
-114.352	-50.0651	0
-0.739514	-56.9269	0
133.559	-53.8856	0
-167.792	-51.9446	0
-136.415	-54.7328	0
23.1816	-53.7656	0
72.9878	-65.6718	0
-121.447	-50.9857	0
-94.3709	-64.7891	0
155.606	-47.9941	0
78.3316	-56.9158	0
168.192	-69.0166	0
8.80842	-48.2869	0
-48.4347	-61.3153	0
91.5549	-49.7072	0
-29.2708	-57.6093	0
129.373	-59.9399	0
-144.406	-46.2904	0
-132.956	-52.1727	0
-50.5671	-58.2162	0
-26.1037	-61.4135	0
-145.837	-56.5427	0
-61.1771	-43.622	0
-122.429	-50.4514	0
128.199	-53.5164	0
-105.981	-50.4168	0
-41.5207	-65.0112	0
103.916	-54.8785	0
-127.294	-54.393	0
-101.802	-63.0203	0
162.77	-52.6843	0
78.1701	-50.3568	0
154.987	-52.269	0
161.128	-51.0489	0
-167.014	-49.9452	0
-65.8145	-57.7917	0
-143.466	-64.7177	0
25.2461	-51.9138	0
-125.938	-52.6769	0
-135.059	-73.3565	0
-146.778	-70.4598	0
-69.8412	-67.5901	0
-151.61	-60.9202	0
157.229	-48.7257	0
-33.0679	-54.887	0
149.641	-55.8465	0
-86.203	-57.6352	0
-63.3126	-63.9724	0
-116.944	-48.5483	0
-139.511	-50.1872	0
-57.0783	-63.7011	0
-112.457	-52.3841	0
129.356	-60.9912	0
-70.9543	-61.0538	0
37.9088	-55.0969	0
-146.818	-44.5437	0
-28.9368	-62.9933	0
121.959	-59.4	0
112.251	-52.3793	0
21.7336	-53.6818	0
-159.901	-60.6543	0
64.6958	-59.9752	0
162.468	-61.9405	0
127.165	-51.7317	0
-125.794	-48.3676	0
116.493	-54.6295	0
-164.259	-50.4635	0
-144.413	-47.7839	0
112.818	-59.2834	0
-61.3528	-50.1102	0
-40.2683	-43.544	0
-133.217	-64.1347	0
111.954	-48.0483	0
108.764	-50.0294	0
29.7659	-63.3211	0
0.30754	-73.252	0
81.4942	-66.283	0
116.975	-55.0913	0
112.205	-54.5589	0
-11.3504	-67.8352	0
-147.194	-71.0737	0
7.98958	-53.2522	0
12.9335	-48.9851	0
0.630144	-47.091	0
-3.31358	-46.5926	0
-120.099	-50.2353	0
17.1142	-46.5645	0
-27.2053	-56.8174	0
-144.852	-72.634	0
89.3029	-53.5236	0
-59.1486	-60.7242	0
125.764	-49.4937	0
-44.9774	-46.8028	0
33.3191	-48.713	0
-80.2403	-60.1893	0
68.9629	-49.108	0
-176.268	-71.2186	0
116.713	-54.2073	0
137.867	-55.0132	0
50.5088	-49.0502	0
-130.911	-72.8414	0
143.123	-43.0521	0
-156.698	-60.1626	0
-55.3363	-72.2628	0
3.75289	-49.6244	0
-76.1727	-66.8225	0
-39.2209	-44.2014	0
126.173	-54.4249	0
-78.344	-60.8515	0
-81.735	-69.7914	0
135.931	-54.5611	0
-149.805	-63.8902	0
-86.8991	-57.8428	0
-150.163	-45.1667	0
-128.438	-52.877	0
45.455	-60.1157	0
98.2358	-48.4766	0
23.6016	-49.4609	0
-51.2778	-49.2309	0
-54.1361	-69.9676	0
-79.5009	-64.2267	0
-150.736	-43.0364	0
-110.965	-72.052	0
-43.4673	-53.3518	0
109.428	-49.9226	0
-104.253	-61.4878	0
-50.4545	-45.5	0
109.45	-48.4918	0
97.1039	-45.927	0
75.0453	-49.8779	0
-147.749	-71.0431	0
-65.563	-66.1896	0
-147.626	-43.4448	0
-51.5659	-72.8451	0
-145.259	-45.3517	0
35.6879	-50.0894	0
50.8532	-56.4881	0
66.0772	-66.4898	0
163.491	-48.5311	0
22.024	-50.4628	0
-47.3313	-48.6637	0
89.1956	-50.4348	0
-49.712	-50.4805	0
150.434	-52.6882	0
110.027	-60.68	0
-21.9554	-47.4923	0
139.768	-53.8354	0
106.073	-50.6625	0
-134.789	-61.8594	0
143.505	-43.9211	0
151.596	-63.185	0
159.204	-42.8646	0
84.0429	-46.9443	0
-91.3045	-56.7153	0
-135.37	-49.9684	0
-101.237	-51.1823	0
2.88934	-47.9646	0
154.447	-58.0501	0
-73.6709	-56.2668	0
-38.386	-44.9211	0
-6.31944	-50.7442	0
115.295	-57.8317	0
117.365	-61.9392	0
156.524	-62.283	0
-22.9164	-60.0243	0
69.7197	-48.3877	0
145.517	-46.554	0
143.487	-61.1831	0
-124.217	-57.2297	0
66.4171	-54.7093	0
-34.0043	-63.4242	0
-127.199	-54.007	0
69.4237	-49.8619	0
-129.808	-53.689	0
-47.3401	-47.9144	0
105.574	-54.7814	0
-162.214	-48.9531	0
-52.4261	-59.877	0
-46.5452	-61.1783	0
-143.269	-51.093	0
-121.42	-46.4923	0
101.88	-55.2776	0
123.868	-58.796	0
0.0904589	-45.8982	0
-130.986	-51.7131	0
-68.2025	-62.1825	0
-42.07	-42.256	0
140.209	-61.2505	0
-117.063	-64.3433	0
-117.802	-50.4891	0
-102.931	-58.915	0
-50.5607	-48.0358	0
-125.044	-64.9997	0
114.875	-55.6919	0
-156.603	-60.9935	0
-149.121	-43.7104	0
153.05	-50.1378	0
-68.8306	-68.2207	0
-128.226	-52.3394	0
114.295	-49.616	0
141.867	-61.7898	0
-118.69	-61.5498	0
29.893	-50.3959	0
132.933	-58.4624	0
-66.6503	-55.8189	0
-15.7036	-44.7617	0
107.96	-49.4438	0
72.3298	-53.8288	0
3.47877	-63.2125	0
-25.0737	-44.675	0
-121.956	-51.8682	0
-19.2963	-61.2587	0
-26.8708	-64.7522	0
75.4579	-53.9067	0
84.2999	-51.1547	0
-169.017	-63.6931	0
15.2525	-60.3582	0
147.111	-45.5061	0
106.82	-49.5701	0
-1.46902	-50.8494	0
-79.2398	-64.4353	0
20.2745	-64.672	0
91.0519	-54.4623	0
60.8675	-52.8175	0
-147.203	-45.4317	0
59.7331	-50.4733	0
-142.519	-48.5958	0
-55.9745	-60.1307	0
-146.107	-61.3684	0
-74.8369	-60.904	0
-150.903	-53.5501	0
-138.989	-50.1522	0
63.838	-50.4428	0
62.9578	-54.6275	0
17.8869	-49.4684	0
69.9833	-50.1148	0
79.1198	-54.864	0
175.44	-62.1429	0
133.451	-53.0563	0
14.9261	-49.5175	0
-28.8058	-55.9277	0
-164.272	-66.7936	0
-52.2814	-63.7104	0
136.096	-63.1611	0
70.7541	-54.4318	0
-111.955	-51.7473	0
-69.4002	-59.2599	0
-126.25	-59.3788	0
-142.019	-55.0395	0
-122.455	-56.0074	0
148.84	-48.6548	0
-80.4743	-59.7087	0
25.7226	-52.3854	0
40.0335	-62.3579	0
-7.49736	-56.7066	0
-166.985	-48.4919	0
-146.234	-69.0037	0
39.2322	-54.1758	0
153.332	-49.8625	0
-58.9988	-58.5763	0
-22.7998	-60.263	0
-88.4416	-67.1222	0
-135.777	-43.5924	0
113.256	-59.337	0
-35.5085	-59.1239	0
-137.418	-53.3597	0
91.8346	-59.3438	0
173.563	-63.185	0
-41.7175	-43.175	0
62.0219	-51.6421	0
-159.506	-52.7311	0
-140.744	-62.6348	0
152.994	-50.8274	0
-48.8559	-56.1081	0
2.71281	-48.7251	0
-77.6972	-65.6187	0
-48.5166	-56.4028	0
19.0729	-54.2564	0
-116.084	-53.3417	0
27.0492	-58.4391	0
-50.6505	-61.1595	0
98.9684	-48.8771	0
-48.5583	-57.8996	0
38.7954	-63.1822	0
-130.979	-52.8189	0
-102.808	-61.7669	0
148.911	-60.1108	0
82.7901	-50.5548	0
-168.581	-78.0467	0
149.357	-48.9324	0
-55.1698	-56.8635	0
-106.976	-60.7173	0
156.544	-61.1128	0
-45.9915	-60.8272	0
102.518	-50.315	0
-44.1026	-63.6109	0
12.766	-51.2071	0
157.501	-65.7089	0
156.693	-46.8337	0
2.59147	-47.5042	0
-60.3344	-70.777	0
-121.838	-57.4298	0
167.11	-69.2466	0
-116.857	-50.0035	0
162.272	-52.4979	0
-114.224	-57.1631	0
-143.042	-48.2024	0
-3.5102	-53.2841	0
-134.403	-50.035	0
-162.578	-50.024	0
81.5766	-58.0439	0
-4.28449	-44.9555	0
173.742	-55.3818	0
-141.757	-51.3241	0
159.509	-50.7917	0
121.395	-54.2667	0
-125.544	-57.1907	0
159.691	-49.6923	0
-12.4292	-60.2844	0
22.125	-52.1164	0
-96.1527	-63.1101	0
34.3501	-54.8859	0
-30.7223	-43.7479	0
-132.971	-58.3233	0
-92.5697	-63.3455	0
115.361	-55.7667	0
-17.9947	-46.836	0
39.84	-51.5493	0
38.1168	-51.2403	0
29.5651	-59.0749	0
-119.074	-60.2194	0
164.093	-63.5887	0
-135.905	-49.7327	0
113.681	-50.3913	0
28.9235	-54.4284	0
-133.016	-54.3577	0
70.9666	-51.6264	0
-37.8675	-63.4379	0
-34.5713	-59.2264	0
127.66	-59.1521	0
-106.794	-49.3983	0
155.752	-46.0549	0
23.8589	-52.32	0
21.8813	-53.2115	0
-146.751	-56.6383	0
-29.4275	-62.9381	0
77.7412	-48.0443	0
-105.998	-60.8338	0
122.076	-55.3377	0
-123.331	-49.9793	0
43.3654	-59.2913	0
-132.974	-53.3701	0
116.004	-50.6073	0
-64.0355	-48.8122	0
-169.006	-76.3174	0
-67.8948	-57.6762	0
-61.5326	-50.6005	0
-27.8463	-62.7524	0
-141.607	-48.0413	0
-119.628	-48.8813	0
143.336	-53.5165	0
-69.3268	-59.5868	0
-119.894	-55.1942	0
78.4647	-51.899	0
-143.546	-48.4908	0
124.945	-50.759	0
32.0397	-59.5425	0
-133.968	-49.8042	0
16.0317	-49.4111	0
7.96068	-54.5186	0
13.4534	-62.6824	0
32.4852	-61.8852	0
-43.024	-57.542	0
37.2359	-62.8927	0
-46.7394	-71.6277	0
-98.7318	-62.5013	0
-66.0719	-61.2244	0
-177.564	-65.4719	0
111.881	-51.9624	0
-138.376	-53.1545	0
120.124	-59.7221	0
-13.7489	-55.9263	0
65.9442	-56.7341	0
-117.176	-65.2477	0
-34.108	-54.1746	0
-113.601	-51.7127	0
120.142	-52.8964	0
47.8288	-55.9938	0
-146.127	-50.502	0
108.451	-48.8796	0
77.2849	-52.8175	0
-69.2935	-56.7935	0
102.135	-51.9226	0
-17.8105	-59.8562	0
-99.8734	-67.791	0
-22.6636	-63.7285	0
28.9466	-56.4232	0
-104.338	-48.4408	0
151.423	-47.5367	0
78.051	-48.4056	0
-39.0527	-55.9023	0
-119.06	-64.9923	0
83.3713	-56.81	0
53.3999	-53.5608	0
-6.72953	-55.7317	0
47.3286	-56.3106	0
21.236	-51.486	0
-120.88	-51.2838	0
-5.38514	-51.0264	0
-116.818	-55.2785	0
-131.005	-61.6698	0
-3.08777	-46.7527	0
95.3718	-50.2716	0
-62.2213	-50.817	0
-94.7054	-60.8994	0
135.628	-48.9417	0
24.0612	-54.0179	0
148.175	-45.0716	0
-62.9054	-51.2117	0
106.771	-49.0668	0
-161.283	-69.3619	0
111.656	-53.7818	0
163.324	-72.5287	0
47.9553	-66.3124	0
-172.273	-50.7923	0
-96.5714	-64.6123	0
24.5125	-53.3851	0
72.5326	-52.6747	0
-50.5357	-58.7322	0
65.2913	-45.957	0
57.8729	-53.4509	0
-22.8538	-63.7129	0
68.3646	-48.3744	0
86.7507	-48.9063	0
-138.835	-55.8737	0
-164.819	-50.7622	0
-147.48	-57.2146	0
-26.5568	-55.4798	0
152.778	-54.639	0
-127.021	-52.9843	0
-172.636	-48.2776	0
86.6293	-48.2564	0
-124.851	-54.1553	0
-63.7533	-47.9173	0
127.489	-58.7791	0
126.684	-55.1277	0
-159.518	-67.1063	0
104.044	-62.2382	0
-172.667	-75.4162	0
-44.1635	-61.4321	0
66.0504	-46.294	0
-70.4656	-61.948	0
-76.1337	-60.5431	0
-53.0051	-57.4899	0
51.1638	-61.7246	0
-151.179	-64.6111	0
121.436	-59.8277	0
-120.995	-50.9415	0
-110.419	-50.3409	0
-133.776	-50.6585	0
52.8975	-49.4308	0
22.0981	-59.9662	0
-43.8894	-58.0344	0
98.7824	-49.1525	0
101.695	-60.0806	0
7.67843	-47.2083	0
88.3285	-56.7158	0
-175.132	-52.9808	0
-22.114	-57.3542	0
-147.762	-70.4536	0
-115.329	-65.3694	0
-98.5148	-65.1324	0
-120.604	-56.2709	0
31.504	-53.7708	0
-49.1933	-44.0168	0
123.52	-54.8932	0
-143.117	-49.2605	0
-145.847	-55.2806	0
122.668	-56.316	0
-173.313	-50.5559	0
108.103	-48.9833	0
-122.11	-49.1734	0
-53.3699	-57.6227	0
104.159	-51.0178	0
100.089	-50.2356	0
10.2879	-56.0892	0
50.6367	-50.7938	0
129.866	-53.2539	0
-68.6896	-58.3852	0
-128.75	-55.38	0
-47.4804	-45.7017	0
109.654	-50.682	0
-7.6168	-55.2848	0
147.176	-46.9446	0
-134.808	-55.029	0
-104.737	-57.4986	0
134.823	-58.4895	0
-29.5806	-58.6543	0
62.1242	-52.3085	0
42.6824	-49.7873	0
152.937	-45.8125	0
123.855	-71.8512	0
-125.61	-55.0782	0
106.95	-53.7812	0
27.7875	-56.3742	0
83.6697	-58.385	0
-20.8657	-44.6105	0
-141.288	-59.1037	0
93.0909	-50.6699	0
147.123	-68.337	0
-151.862	-67.8172	0
13.7656	-53.0827	0
-38.7555	-56.6437	0
-66.9698	-53.7396	0
-67.6705	-57.172	0
78.5111	-49.6176	0
-22.7135	-50.3884	0
-46.7351	-55.9975	0
-11.3937	-58.847	0
-114.737	-63.3933	0
-147.944	-62.3662	0
90.8846	-53.7467	0
115.462	-50.2195	0
143.787	-62.0528	0
-102.538	-58.1508	0
-106.164	-48.0781	0
-11.1291	-60.951	0
-19.5375	-56.3636	0
55.9258	-50.9716	0
88.6865	-47.9876	0
95.9132	-51.0359	0
-13.0388	-62.5993	0
-34.01	-59.1332	0
-150.807	-61.741	0
-61.2473	-59.3569	0
129.747	-59.8787	0
131.647	-61.8693	0
34.2054	-53.9476	0
153.8	-48.3741	0
35.1194	-48.9296	0
-134.785	-68.5327	0
57.6504	-61.2855	0
148.235	-45.7791	0
-91.1463	-70.9012	0
126.587	-55.6409	0
102.794	-50.0581	0
-140.972	-50.996	0
151.12	-47.3856	0
-84.208	-68.0145	0
-144.995	-74.076	0
-97.5166	-63.1991	0
127.56	-57.3286	0
28.7517	-50.8909	0
-38.0485	-46.1921	0
24.8933	-51.5927	0
149.361	-67.3038	0
108.193	-51.4523	0
28.7193	-56.3301	0
-83.7619	-62.2075	0
149.789	-44.1383	0
156.773	-48.8575	0
-165.955	-60.1345	0
-106.583	-72.6223	0
-134.295	-53.3757	0
-129.658	-51.7252	0
-16.9488	-51.9554	0
-67.0799	-70.1202	0
-125.102	-51.7078	0
-78.1496	-62.5336	0
-137.301	-45.995	0
1.7109	-47.4972	0
-38.6924	-66.4861	0
-135.268	-56.0246	0
-110.756	-64.18	0
-142.064	-49.4542	0
-68.777	-64.2865	0
-29.4826	-56.1849	0
18.3419	-50.9336	0
155.268	-49.3455	0
133.634	-53.6879	0
-106.418	-57.5869	0
31.4167	-50.1395	0
107.601	-49.5662	0
102.793	-54.2208	0
-34.3365	-63.6178	0
-111.184	-52.0684	0
34.3495	-63.8377	0
121.123	-49.247	0
-7.87538	-52.3041	0
-93.8326	-58.1092	0
27.2795	-52.7985	0
108.225	-48.6355	0
-41.8728	-43.7551	0
18.1051	-48.9753	0
98.0656	-49.7516	0
160.907	-47.2659	0
-124.567	-49.9094	0
100.304	-64.9688	0
87.3206	-64.4293	0
141.203	-58.399	0
150.335	-58.1241	0
92.9377	-49.3418	0
103.118	-50.4172	0
12.1361	-47.5838	0
14.102	-56.3486	0
159.916	-62.9191	0
128.899	-54.5556	0
0.268939	-55.8607	0
-149.28	-47.7962	0
-47.2478	-44.88	0
110.183	-49.1266	0
-165.788	-53.7241	0
3.89881	-53.9418	0
-115.168	-48.4959	0
134.59	-57.9227	0
-90.5845	-50.2821	0
-29.804	-56.9336	0
127.347	-62.7386	0
-111.676	-55.7018	0
33.2525	-60.7344	0
115.624	-50.3406	0
54.0614	-52.0963	0
-47.5134	-56.3317	0
-116.28	-54.6938	0
31.8219	-49.969	0
90.4445	-54.8562	0
75.0361	-48.8817	0
52.8789	-52.4923	0
-46.7583	-62.2285	0
-135.426	-51.7856	0
-62.7822	-62.2677	0
-53.426	-47.5096	0
-137.658	-54.8781	0
-3.73211	-48.6012	0
52.0043	-63.1208	0
-145.028	-43.7257	0
-44.4679	-56.1907	0
79.252	-58.633	0
-148.993	-63.6113	0
-151.654	-65.3885	0
-125.645	-53.7062	0
-133.548	-71.8797	0
-29.9329	-57.9068	0
-70.1718	-58.3959	0
141.804	-56.872	0
159.719	-48.7996	0
25.454	-52.8416	0
-171.547	-51.3197	0
112.432	-49.9134	0
-169.833	-50.1216	0
93.7748	-54.2224	0
139.572	-64.3365	0
110.538	-53.5829	0
117.343	-50.8768	0
156.205	-63.5538	0
-43.931	-45.9424	0
-42.6266	-43.8339	0
158.31	-51.1037	0
-2.69302	-45.6318	0
168.454	-54.0983	0
165.241	-48.2638	0
141.868	-56.1699	0
-40.9442	-65.4018	0
151.992	-48.7268	0
-94.0699	-63.4631	0
-144.393	-58.7026	0
167.926	-49.0045	0
-136.502	-68.7134	0
17.9325	-59.8565	0
-33.9032	-56.8266	0
8.50131	-47.7843	0
154.98	-51.701	0
18.3258	-53.6591	0
-135.322	-52.2334	0
158.709	-61.7051	0
16.9851	-49.3226	0
-80.639	-69.5504	0
-137.42	-55.8697	0
-24.4164	-64.8875	0
-87.3566	-61.1348	0
144.969	-47.5878	0
43.5714	-57.7271	0
-150.719	-60.9086	0
-56.7891	-55.3138	0
-149.757	-51.2454	0
-142.024	-53.5996	0
-122.786	-54.3375	0
-122.35	-50.355	0
39.6186	-49.3899	0
-116.673	-53.731	0
117.834	-53.7266	0
-66.0218	-48.4516	0
106.02	-54.4837	0
158.831	-51.1633	0
-119.073	-52.4569	0
104.939	-52.8319	0
-143.337	-48.8864	0
-59.0442	-58.1671	0
3.54351	-50.5559	0
-101.519	-71.8634	0
-64.3015	-57.6866	0
75.871	-52.655	0
-119.353	-49.5882	0
172.126	-71.0703	0
111.423	-62.6795	0
-6.03906	-50.8234	0
-131.396	-53.7727	0
136.054	-58.7536	0
-48.4348	-46.033	0
120.513	-60.0519	0
66.869	-57.8357	0
-129.533	-51.6648	0
-141.099	-45.0004	0
113.699	-53.3089	0
40.4122	-51.6693	0
159.855	-59.4431	0
103.234	-50.1346	0
108.389	-50.031	0
-143.516	-72.2603	0
61.0404	-52.3123	0
-113.346	-65.9213	0
149.227	-66.3323	0
97.298	-41.5072	0
149.672	-55.1431	0
-109.947	-50.9637	0
-146.755	-63.271	0
131.728	-58.1321	0
88.4068	-55.2232	0
-174.304	-52.0227	0
-169.74	-48.5972	0
23.4137	-51.5266	0
-65.3685	-49.025	0
153.257	-51.8702	0
72.4601	-49.3853	0
-164.357	-68.7508	0
-73.0957	-60.2793	0
105.627	-48.3657	0
-58.9484	-59.1678	0
61.4246	-52.0911	0
-123.879	-57.5949	0
101.564	-48.4988	0
166.753	-54.338	0
64.0787	-54.1563	0
-85.3449	-70.2585	0
-68.5732	-68.7486	0
-136.604	-50.8158	0
67.738	-56.2204	0
-112.333	-53.9277	0
-114.819	-52.7709	0
-129.446	-53.6445	0
-55.2169	-59.6533	0
74.153	-57.3648	0
-32.807	-43.6903	0
-120.633	-50.9773	0
64.4948	-59.0153	0
73.7514	-58.4753	0
-75.6217	-63.4278	0
43.9532	-50.7544	0
15.6989	-56.9359	0
33.3582	-61.4471	0
171.704	-68.2004	0
-82.721	-62.4695	0
-86.2183	-66.2059	0
83.5607	-54.0955	0
21.4873	-53.0856	0
-170.974	-49.548	0
100.485	-59.9713	0
154.002	-50.6409	0
-29.8907	-59.0028	0
25.7915	-59.4039	0
-132.083	-56.0666	0
107.007	-48.8971	0
-89.5569	-64.1471	0
-60.9903	-57.175	0
140.514	-55.5254	0
58.0333	-49.8312	0
163.579	-52.0485	0
123.625	-52.5151	0
-105.425	-65.9332	0
63.8261	-52.0203	0
-127.344	-51.0919	0
-100.566	-72.0463	0
-30.3545	-62.659	0
114.609	-59.6468	0
-65.0383	-59.7165	0
-128.045	-50.971	0
-139.008	-59.5346	0
115.104	-53.4443	0
-19.8043	-53.8973	0
102.536	-52.125	0
-46.1828	-56.5559	0
102.805	-49.7889	0
-62.8585	-71.2765	0
71.7224	-46.037	0
141.472	-62.6968	0
-174.672	-51.0894	0
-61.8994	-49.3676	0
-4.03439	-49.5177	0
43.2465	-59.3375	0
158.416	-50.6131	0
2.11365	-52.5522	0
40.7692	-59.1753	0
-8.52705	-58.0154	0
-140.012	-50.1879	0
-21.2579	-54.7705	0
-70.9324	-63.9615	0
-0.654321	-55.6127	0
-117.327	-71.3779	0
-170.609	-52.1961	0
-116.544	-50.3308	0
-131.047	-52.3581	0
101.517	-47.0621	0
69.6899	-55.6012	0
-45.9268	-58.7476	0
-110.644	-55.179	0
-138.588	-55.4154	0
39.2402	-50.3407	0
28.8318	-50.6862	0
97.3189	-44.7173	0
-154.293	-67.2822	0
-134.959	-66.1193	0
-123.204	-49.2502	0
93.1216	-58.7091	0
-2.72549	-45.8002	0
68.951	-48.041	0
33.241	-53.8421	0
-143.084	-41.6999	0
141.338	-45.5846	0
27.3273	-51.3376	0
109.33	-50.6163	0
-65.9033	-59.6255	0
75.9685	-47.4544	0
-130.779	-51.8807	0
-145.182	-46.7901	0
156.575	-65.8987	0
20.7788	-48.807	0
135.792	-54.7817	0
109.414	-51.7598	0
64.2741	-52.2284	0
-138.439	-50.1266	0
-26.5703	-60.58	0
-2.58589	-47.0445	0
-138.126	-64.5598	0
107.145	-54.4935	0
-86.4583	-52.8352	0
152.187	-65.5335	0
-144.084	-50.5219	0
127.594	-57.9017	0
-39.4759	-44.7302	0
-40.6326	-44.8642	0
-86.0868	-55.3906	0
-24.5148	-51.8719	0
-68.9044	-63.0936	0
134.282	-54.4409	0
-177.46	-75.4811	0
-75.0948	-60.6312	0
55.8926	-51.7735	0
156.412	-48.2123	0
59.2777	-55.87	0
-35.5836	-55.3062	0
108.717	-61.7783	0
-143.94	-43.0425	0
-105.21	-55.3478	0
-24.0421	-55.2625	0
-150.883	-44.0012	0
145.92	-65.6799	0
-75.2758	-58.8364	0
-171.881	-48.999	0
145.33	-46.2401	0
135.566	-52.0066	0
-158.496	-69.5809	0
-123.893	-64.7265	0
-109.413	-58.7139	0
-154.842	-59.7844	0
-148.476	-61.3669	0
32.0278	-63.4591	0
42.488	-58.1339	0
137.37	-52.3894	0
-65.5187	-72.1267	0
-50.6893	-60.639	0
-9.05059	-61.1072	0
-106.448	-57.1357	0
-26.4231	-48.0952	0
102.466	-61.2203	0
51.5879	-50.3735	0
-157.546	-59.4622	0
99.3168	-63.3822	0
-54.555	-50.0993	0
-106.087	-58.2491	0
44.5575	-55.6798	0
-130.749	-49.5062	0
-126.806	-52.9002	0
-144.149	-51.0842	0
-84.7537	-56.5876	0
20.325	-63.8092	0
151.758	-58.2801	0
116.289	-55.7606	0
157.195	-65.8386	0
177.993	-71.6164	0
-74.7432	-66.1034	0
-141.032	-64.6984	0
-67.1476	-59.5871	0
140.47	-61.9035	0
-157.643	-62.5859	0
-118.776	-48.6725	0
-143.67	-47.0581	0
-29.724	-61.9065	0
-112.4	-55.7111	0
124.341	-63.8976	0
35.191	-54.1908	0
-152.351	-65.6364	0
-149.036	-61.0264	0
57.8443	-53.648	0
-50.0425	-63.5843	0
41.1864	-52.9527	0
-56.129	-59.1356	0
-56.8615	-67.8709	0
162.32	-52.6926	0
-70.9707	-62.6235	0
-66.1973	-63.1407	0
-139.759	-69.1339	0
109.04	-50.4827	0
19.0183	-53.0343	0
-163.91	-69.6046	0
95.8635	-47.4497	0
-86.6665	-52.3045	0
58.4876	-47.8901	0
84.5236	-44.6742	0
-35.0281	-56.2031	0
123.886	-60.9982	0
-4.30076	-52.597	0
-87.0796	-64.4723	0
30.6749	-63.2714	0
84.7176	-67.0957	0
-76.3514	-57.7066	0
121.987	-65.429	0
108.178	-49.9493	0
150.137	-54.9193	0
-171.361	-70.1697	0
-135.763	-57.9185	0
130.368	-53.0917	0
-121.457	-51.5407	0
-88.9525	-68.8474	0
98.5969	-48.689	0
55.206	-48.4631	0
-41.7115	-47.6134	0
144.231	-60.9045	0
144.329	-55.0104	0
-13.3103	-52.0463	0
-114.403	-59.7284	0
-100.417	-71.6269	0
-107.438	-49.0143	0
112.707	-50.9637	0
-111.765	-61.3496	0
-113.208	-62.6392	0
91.3295	-54.28	0
113.652	-53.3804	0
133.768	-42.1263	0
-47.5318	-46.5659	0
-124.14	-48.8707	0
-132.497	-45.1613	0
33.8026	-49.2502	0
67.0701	-61.2034	0
22.1365	-52.379	0
-123.089	-52.7236	0
17.0536	-48.9464	0
38.9088	-49.1401	0
-149.649	-57.5976	0
-45.9515	-57.8009	0
-132.128	-52.9077	0
-52.3598	-67.5609	0
165.594	-66.2508	0
98.418	-52.0836	0
68.2188	-55.9662	0
112.714	-51.3871	0
-9.34543	-42.9816	0
129.876	-58.1984	0
53.285	-56.1959	0
-147.126	-71.6561	0
-63.7949	-50.1618	0
-135.4	-55.0192	0
-117.612	-50.9439	0
114.405	-46.6764	0
-126.58	-59.704	0
112.346	-61.5371	0
-72.011	-56.4382	0
31.81	-56.3416	0
-106.395	-61.7717	0
0.0283923	-54.9207	0
27.9097	-52.596	0
122.795	-54.4511	0
-129.277	-54.1883	0
63.6833	-55.0033	0
-151.355	-58.2553	0
-34.0526	-65.5496	0
158.536	-50.0487	0
107.069	-49.282	0
-125.819	-50.4765	0
114.334	-50.2171	0
-135.162	-68.0426	0
122.426	-53.1206	0
163.229	-51.0973	0
148.079	-59.5252	0
19.3889	-51.9694	0
162.829	-67.7853	0
-170.821	-46.1734	0
-129.388	-52.3227	0
159.861	-51.6921	0
-160.823	-67.3173	0
-139.187	-54.229	0
141.319	-53.7483	0
-139.852	-50.6949	0
104.219	-48.9959	0
-24.3505	-58.473	0
-134.032	-52.2625	0
-96.3723	-59.9847	0
-153.426	-59.753	0
-93.2297	-60.9529	0
161.513	-63.2518	0
-142.039	-57.9547	0
66.3124	-50.6402	0
-144.642	-51.6607	0
-175.028	-51.7877	0
-48.8581	-58.5843	0
-89.867	-60.1673	0
-74.6528	-49.0275	0
31.7398	-57.5554	0
-111.196	-49.4516	0
-64.2965	-65.6193	0
5.41549	-53.9282	0
-86.0789	-58.8658	0
-124.502	-51.8327	0
-144.938	-42.1808	0
-54.1504	-67.7731	0
110.862	-55.7088	0
-146.203	-52.1506	0
-88.7913	-59.2697	0
74.9088	-58.6725	0
-16.7578	-54.7195	0
-47.9195	-64.0308	0
-125.079	-51.0776	0
-115.834	-52.2881	0
-127.327	-52.6582	0
-172.155	-47.0661	0
-159.515	-58.3276	0
-153.587	-47.6352	0
-0.963141	-50.9663	0
157.78	-50.7764	0
-70.7112	-51.6897	0
4.28284	-51.0527	0
64.6087	-51.9859	0
27.52	-47.4543	0
129.885	-59.4609	0
23.6302	-51.0225	0
137.748	-44.2766	0
52.9763	-55.237	0
19.9726	-55.2621	0
71.608	-52.5682	0
82.9644	-58.1996	0
-103.294	-59.8596	0
32.7977	-61.5611	0
-162.05	-70.2772	0
-127.188	-46.0135	0
-144.453	-47.5735	0
42.2741	-57.1905	0
-132.743	-49.9603	0
170.981	-65.5076	0
108.549	-48.955	0
-111.193	-54.9013	0
73.8866	-60.4498	0
-145.006	-44.2072	0
63.2822	-46.5932	0
73.2904	-56.9646	0
1.64835	-56.824	0
-133.174	-55.6446	0
-142.657	-61.2771	0
-124.322	-56.5591	0
-99.2848	-59.3215	0
146.629	-57.4112	0
109.192	-49.8614	0
11.3512	-53.26	0
52.7311	-51.5033	0
-71.4728	-53.8139	0
78.3945	-52.6858	0
120.624	-59.8567	0
19.0852	-55.7594	0
-19.4958	-56.8828	0
-2.57474	-59.2364	0
-38.2418	-61.125	0
-128.152	-52.4752	0
159.136	-57.9683	0
-168.382	-50.5243	0
-56.8667	-59.189	0
-11.7941	-57.8057	0
162.241	-64.0209	0
-62.0443	-63.5878	0
-23.4804	-56.435	0
125.248	-57.8674	0
-176.997	-49.7725	0
-117.571	-50.3265	0
-5.99779	-46.4543	0
-138.811	-46.3333	0
24.9318	-64.8655	0
-66.0511	-59.7105	0
-38.1899	-51.4339	0
-126.42	-59.2758	0
-130.105	-52.6297	0
80.8697	-60.7236	0
-41.9671	-56.9194	0
143.951	-66.6964	0
-39.7325	-62.5613	0
-39.7018	-44.3602	0
-133.82	-53.7677	0
64.5329	-54.5277	0
16.6576	-51.5816	0
159.166	-51.5706	0
-14.8045	-60.8711	0
-138.749	-58.0453	0
-130.665	-52.6433	0
-124.951	-57.8823	0
-147.278	-70.2862	0
-96.9431	-63.0737	0
126.271	-58.604	0
49.7207	-51.4996	0
3.27443	-58.6091	0
-115.051	-55.1754	0
33.7905	-61.1535	0
55.4112	-64.4255	0
111.387	-50.777	0
110.567	-66.4445	0
75.0111	-57.2434	0
112.047	-48.8969	0
-45.5069	-56.8834	0
123.972	-51.6889	0
31.3919	-62.1518	0
22.4434	-63.8298	0
-14.3268	-58.2003	0
163.711	-50.1972	0
27.3992	-52.5197	0
-129.96	-53.3566	0
-24.3737	-54.0961	0
9.63981	-52.1417	0
60.4448	-50.4642	0
29.7456	-50.2305	0
[truncated: 2,962 more rows]
